# Supplementary material
Source: publisher site journal article supplement (https://www.dovepress.com/article/372449)
Supplement: Supplementary file 1 [file get_supplementary_file.php]

**
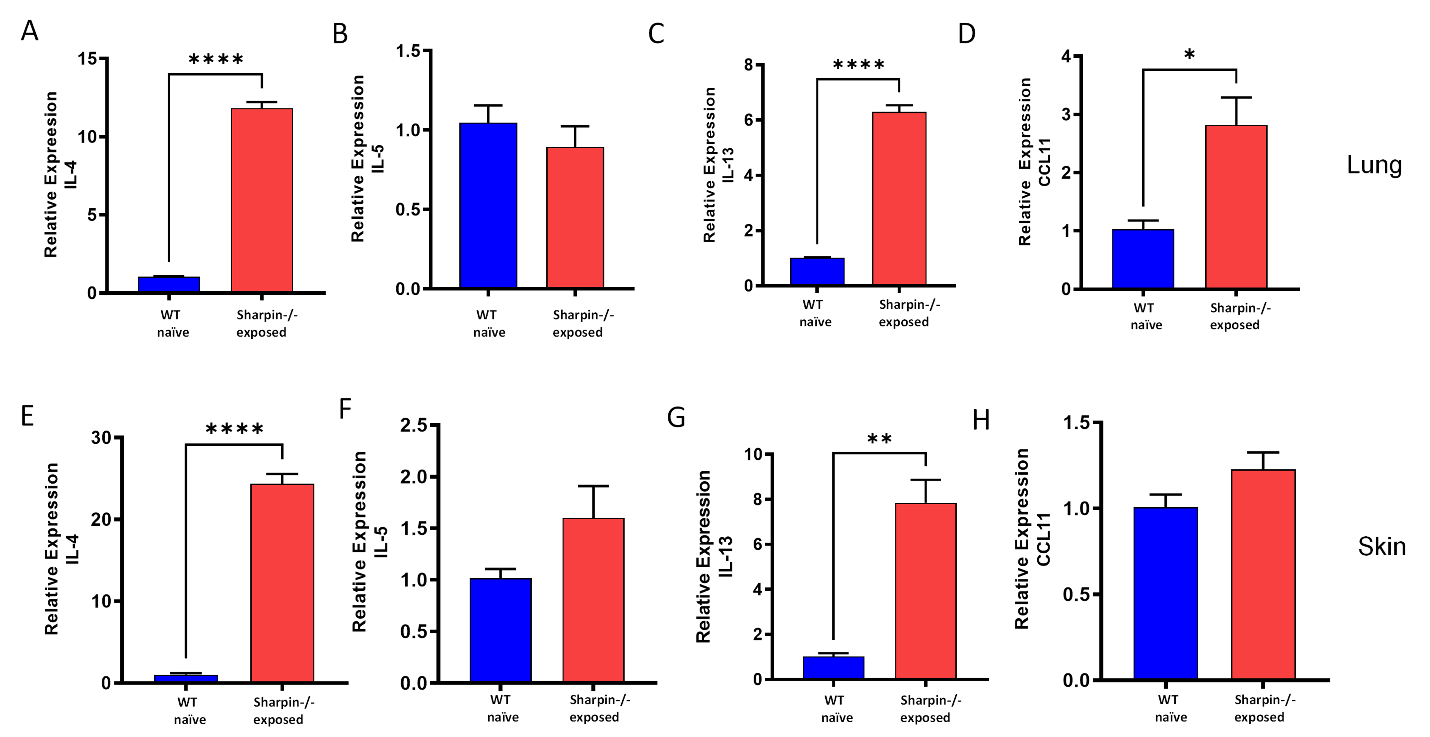
Supplemental Figure 1**

**Supplementary Figure 1: Expression of Th2 cytokine and chemokine in the lung and skin tissue.**

Fold change in mRNA expression of type 2 cytokine IL-4, IL-5, IL-13 and CCL11 respectively in the Lung (A-D) and Skin (E-H) of Sharpin-/- exposed mice (red bar) as compared to WT (blue bar). n=5 mice/group. ****p<0.0001, **p<0.01, *p<0.05 and vs WT naïve.
